# Supplementary material
Source: MDPI journal article supplement (https://www.mdpi.com/2072-4292/13/22/4666)
Supplement: s1 [file s1]

# Supplementary Information for: “An Object- and Topology-Based Analysis (OTBA) Method for Mapping Rice-Crayfish Fields in South China”

Haodong Wei <sup>1</sup>, Qiong Hu <sup>2</sup>, Zhiwen Cai <sup>1</sup>, Jingya Yang <sup>1</sup>, Qian Song <sup>3</sup>, Gaofei Yin <sup>4</sup> and Baodong Xu <sup>1,5,\*</sup>

<sup>1</sup> Macro Agriculture Research Institute, College of Resources and Environment, Huazhong Agricultural University, Wuhan 430070, China; hzau-rsaa@webmail.hzau.edu.cn (H.W.); zhiwen.cai@webmail.hzau.edu.cn (Z.C.); jingya.yang@webmail.hzau.edu.cn (J.Y.)

<sup>2</sup> Key Laboratory for Geographical Process Analysis & Simulation of Hubei Province/College of Urban and Environmental Sciences, Central China Normal University, Wuhan 430079, China; huqiong@mail.ccnu.edu.cn

<sup>3</sup> Key Laboratory of Agricultural Remote Sensing (AGRIRS), Ministry of Agriculture and Rural Affairs/Institute of Agricultural Resources and Regional Planning, Chinese Academy of Agricultural Sciences, Beijing 100081, China; songqian01@caas.cn

<sup>4</sup> Faculty of Geosciences and Environmental Engineering, Southwest Jiaotong University, Chengdu 610031, China; yingf@swjtu.edu.cn

<sup>5</sup> State Key Laboratory of Remote Sensing Science, Jointly Sponsored by Aerospace Information Research Institute, Chinese Academy of Sciences and Beijing Normal University, Beijing 100101, China

\* Correspondence: xubaodong@mail.hzau.edu.cn

**Table S1.** Classification features for extracting RCFs using RGB image.

| Feature Category   | Selected Features                     | Equations                                                                 | Parameters                                                                                            | References |
|--------------------|---------------------------------------|---------------------------------------------------------------------------|-------------------------------------------------------------------------------------------------------|------------|
| Spectral features  | G-index (Greenness index)             | $G - index = \frac{Green}{Red}$                                           | Blue, Green, Red = surface reflectance values of Blue, Green and Red bands.                           | [1]        |
|                    | VIgreen (Green vegetation index)      | $VIgreen = \frac{Green - Red}{Green + Red}$                               | #P <sub>v</sub> = total number of pixels contained in the object P <sub>v</sub> .                     | [2]        |
|                    | Brightness                            | $\bar{c}(v) = \frac{1}{3} \sum_{k=1}^3 c_k(v)$                            | $c_k(x, y, z, t)$ = the image layer intensity value at pixel $(x, y, z, t)$ .                         | [3]        |
|                    | Mean Blue, Green, Red                 | $\bar{c}_k(v) = \frac{1}{\#P_v} \sum_{(x,y,z,t) \in P_v} c_k(x, y, z, t)$ | $N_v^B$ = the darker direct neighbor to v, with $N_v^B \{u \in N_v : \bar{c}_k(u) < \bar{c}_k(v)\}$ . |            |
|                    | Rel. border to brighter objects Green | $\sum_{u \in N_v^B} \frac{b(v, u)}{b_v}$                                  | $b(v, u)$ = the length of common border between v and u.                                              |            |
| Geometric features | Area                                  | $A_v = \#P_v \times u^2$                                                  | u = the pixel size in coordinate system units.                                                        | [3]        |
|                    | Border length                         | $b_v = b_o + b_i$                                                         | b <sub>o</sub> = the length of outer border.                                                          |            |
|                    | Length/Width                          | $\gamma_v = \min \gamma_v^{EV}, \max \gamma_v^{BB}$                       | b <sub>i</sub> = the length of inner border.                                                          |            |

|                   |                  |                                                                       |                                                                                                                                                    |
|-------------------|------------------|-----------------------------------------------------------------------|----------------------------------------------------------------------------------------------------------------------------------------------------|
|                   | Shape index      | $s_v = \frac{b_v}{4\sqrt{A_v}}$                                       | $\gamma_v^{EV}$ = the ratio length of $v$ of the eigenvalues.<br>$\gamma_v^{BB}$ = the ratio length of $v$ of the bounding box.                    |
| Textural features | GLCM Mean        | $\mu_{i,j} = \frac{\sum_{i,j=0}^{N-1} P_{i,j}}{N^2}$                  | $i$ = the row number.<br>$j$ = the column number.<br>$P_{i,j}$ = the normalized value in the cell $i, j$ .<br>$N$ = the number of rows or columns. |
|                   | GLCM Std Dev     | $\sigma_{i,j} = \sqrt{\sum_{i,j=0}^{N-1} P_{i,j}(i,j - \mu_{i,j})^2}$ |                                                                                                                                                    |
|                   | GLCM Entropy     | $e_{i,j} = -\sum_{i,j=0}^{N-1} P_{i,j} \ln P_{i,j}$                   |                                                                                                                                                    |
|                   | GLCM Homogeneity | $h_{i,j} = \sum_{i,j=0}^{N-1} \frac{P_{i,j}}{1 + (i - j)^2}$          |                                                                                                                                                    |
|                   | GLCM Contrast    | $c_{i,j} = \sum_{i,j=0}^{N-1} P_{i,j}(i - j)^2$                       |                                                                                                                                                    |

[3]

**Table S2.** Accuracy assessment about classification results derived by using images with different spectral bands.

|                  | Image with Three Bands (R, G, B) |                 | Image with Four Bands (R, G, B, NIR) |                 |
|------------------|----------------------------------|-----------------|--------------------------------------|-----------------|
|                  | Producer's Accuracy              | User's Accuracy | Producer's Accuracy                  | User's Accuracy |
| RCF              | 75.59%                           | 84.96%          | 90.32%                               | 93.33%          |
| Non-RCF          | 85.71%                           | 76.69%          | 93.28%                               | 93.33%          |
| Overall Accuracy | 80.49%                           |                 | 91.77%                               |                 |

**Table S3.** Accuracy assessment about classification results derived by using images in different phases.

|                  | Flooding Phase      |                 | Rice Growth Phase   |                 |
|------------------|---------------------|-----------------|---------------------|-----------------|
|                  | Producer's Accuracy | User's Accuracy | Producer's Accuracy | User's Accuracy |
| RCF              | 83.64%              | 89.32%          | 90.32%              | 93.33%          |
| Non-RCF          | 88.42%              | 82.35%          | 93.28%              | 93.33%          |
| Overall Accuracy | 85.85%              |                 | 91.77%              |                 |

## References

1. Pena-Barragan, J.M.; Ngugi, M.K.; Plant, R.E.; Six, J. Object-based crop identification using multiple vegetation indices, textural features and crop phenology. *Remote Sens. Environ.* **2011**, *115*, 1301-1316, doi:10.1016/j.rse.2011.01.009.
2. Gitelson, A.A.; Kaufman, Y.J.; Stark, R.; Rundquist, D. Novel algorithms for remote estimation of vegetation fraction. *Remote Sens. Environ.* **2002**, *80*, 76-87, doi:10.1016/S0034-4257(01)00289-9.
3. Trimble. *eCognition Developer 9.0.1 Reference Book*; Trimble Germany GmbH: Munich, Germany, **2014**.
